# Supplementary material for: 3D hierarchical CoO@MnO2 core–shell nanohybrid for high-energy solid state asymmetric supercapacitors
Source: Royal Society of Chemistry journal article supplement (doi:10.1039/c6ta08532f), 2016-11-21
Supplement: c6ta08532f1.pdf [file c6ta08532f1.pdf]

**3D hierarchical CoO@MnO<sub>2</sub> core-shell nanohybrid for high-energy solid  
state asymmetric supercapacitors**

Chao Li,<sup>a</sup> Jayaraman Balamurugan,<sup>a</sup> Tran Duy Thanh,<sup>a</sup> Nam Hoon Kim,<sup>a\*</sup> Joong Hee Lee <sup>a,b\*</sup>

<sup>a</sup>Advanced Materials Institute of BIN Convergence Technology (BK21Plus Global) & Dept.  
of BIN Convergence Technology, Chonbuk National University, Jeonju, Jeonbuk, 54896,  
Republic of Korea.

<sup>b</sup>Carbon Composite Research Center, Department of Polymer-Nano Science and Technology,  
Chonbuk National University, Jeonju, Jeonbuk, 54896, Republic of Korea.

Corresponding to Prof. Joong Hee Lee (jhl@jbnu.ac.kr) and Prof. Nam Hoon Kim  
(nhk@jbnu.ac.kr)

---

*\*Corresponding author:* Fax: +82 63 270 2341; Tel: +82 63 270 2342

*Email address:* Prof. Joong Hee Lee (jhl@jbnu.ac.kr) and Prof. Nam Hoon Kim  
(nhk@jbnu.ac.kr)

---

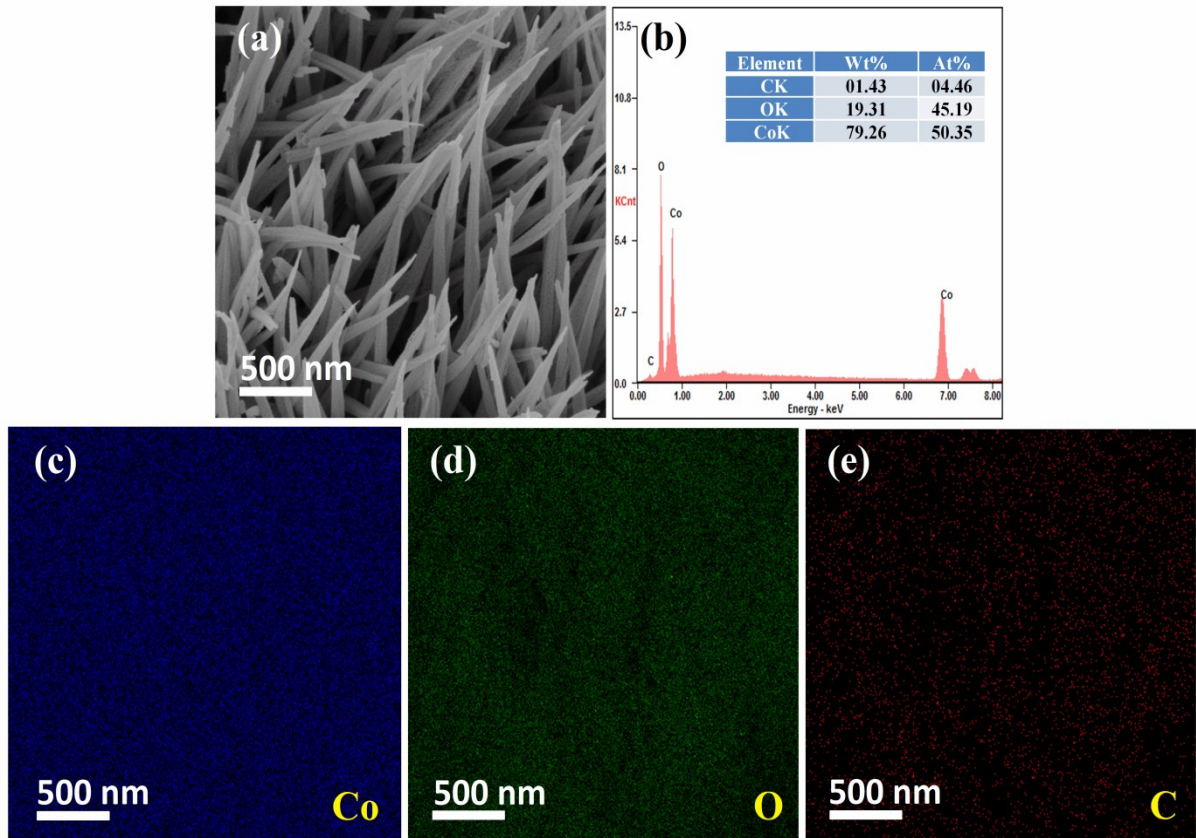

**Fig. S1** (a) FE-SEM, (b) EDAX, and (c-e) EDS color mapping of the carbon coated CoO NWs/Ni foam.

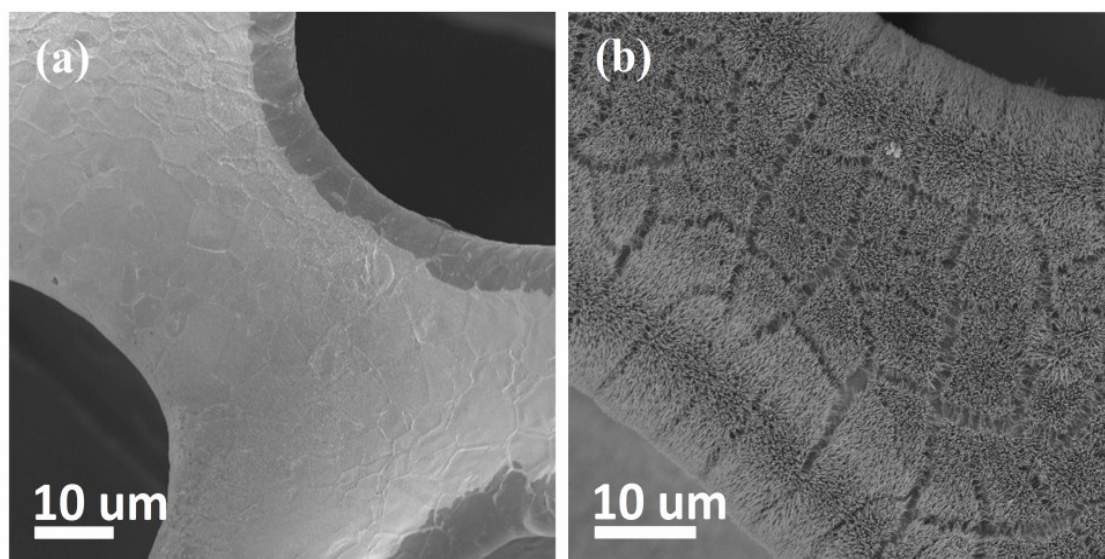

**Fig. S2** FE-SEM images of (a) Bare Ni foam, and (b) as-synthesized CoO NWs/Ni foam.

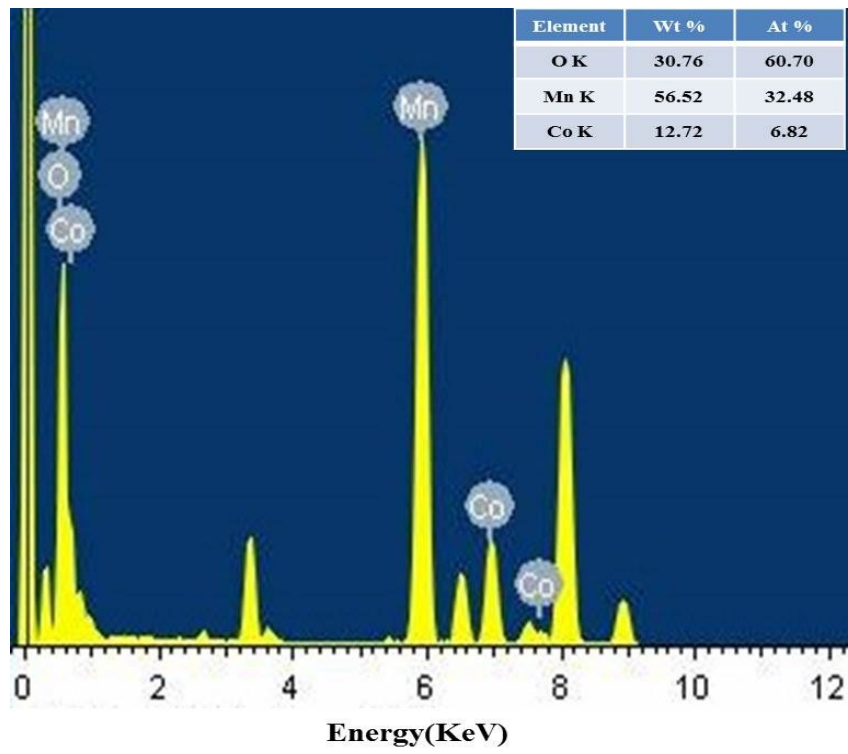

**Fig. S3** EDAX spectrum of 3D CoO@MnO<sub>2</sub> core-shell nanohybrid.

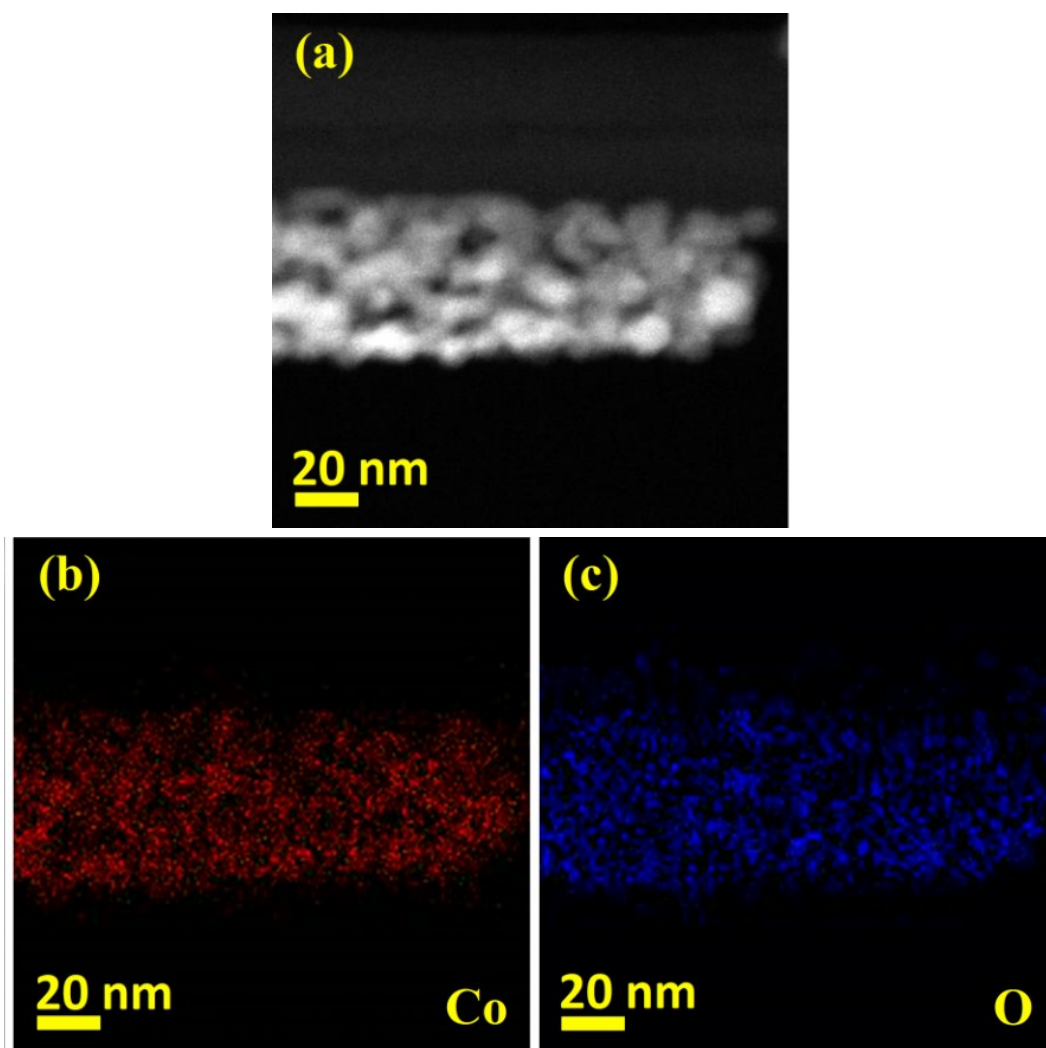

**Fig. S4** Dark field STEM elemental mapping analysis of the CoO NWs (a) selected area and corresponding elemental mapping of (b) cobalt, (c) oxygen.

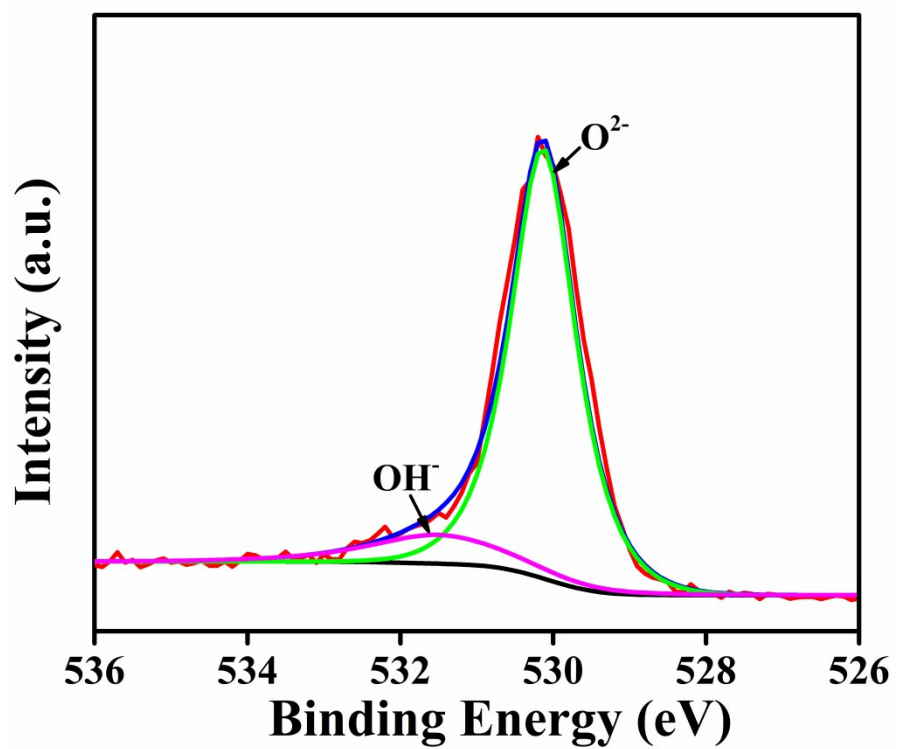

**Fig. S5** High-resolution XPS spectrum of O1s for 3D CoO@MnO<sub>2</sub> core-shell nanohybrid.

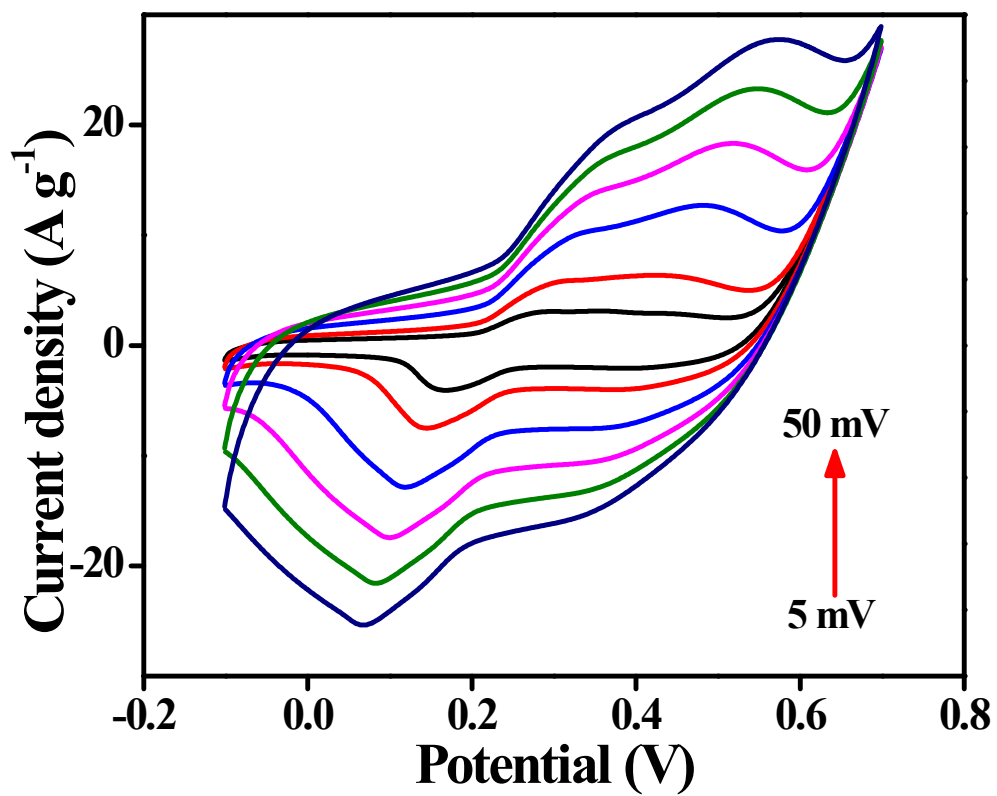

Fig. S6 CV curves with different scan rates of CoO NWs.

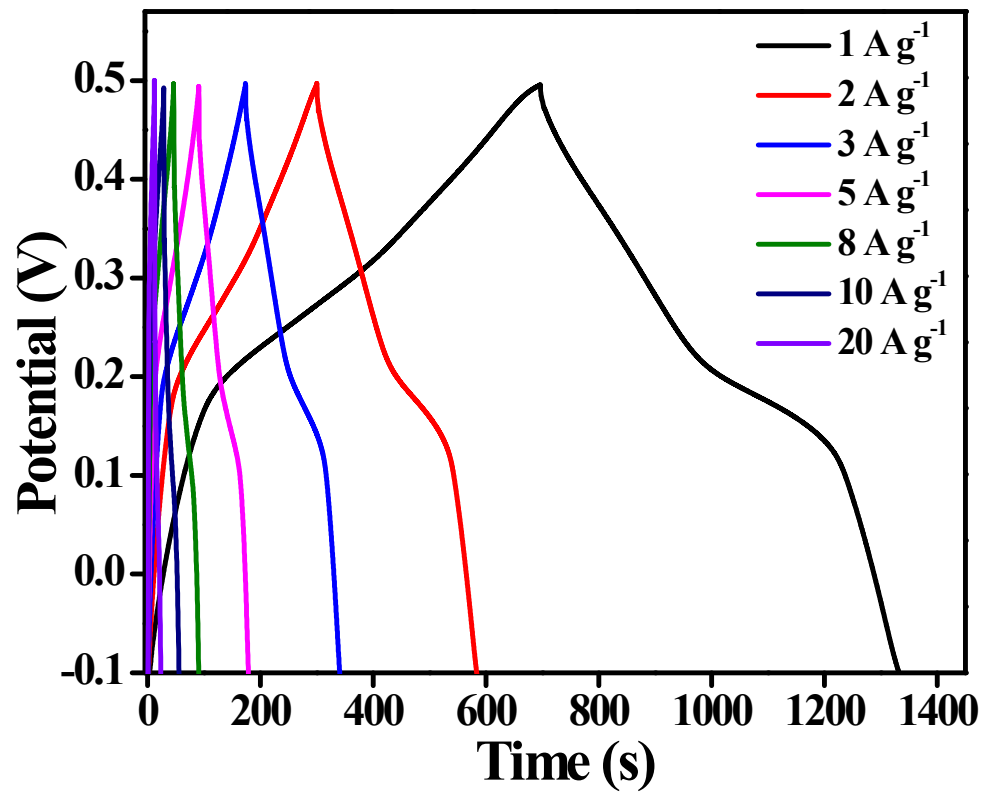

Fig. S7 GCD curves of 3 D CoO NWs at different current density.



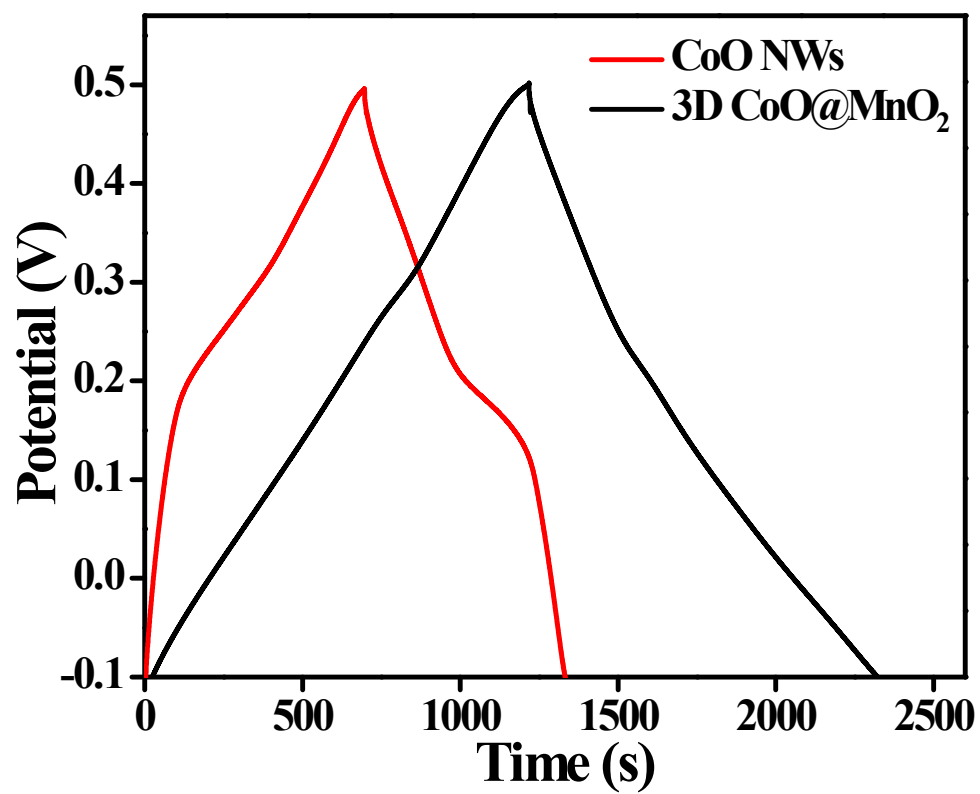

Fig. S8 GCD curves of CoO NWs and 3D CoO@MnO<sub>2</sub> core-shell nanohybrid at 1 A g<sup>-1</sup>.

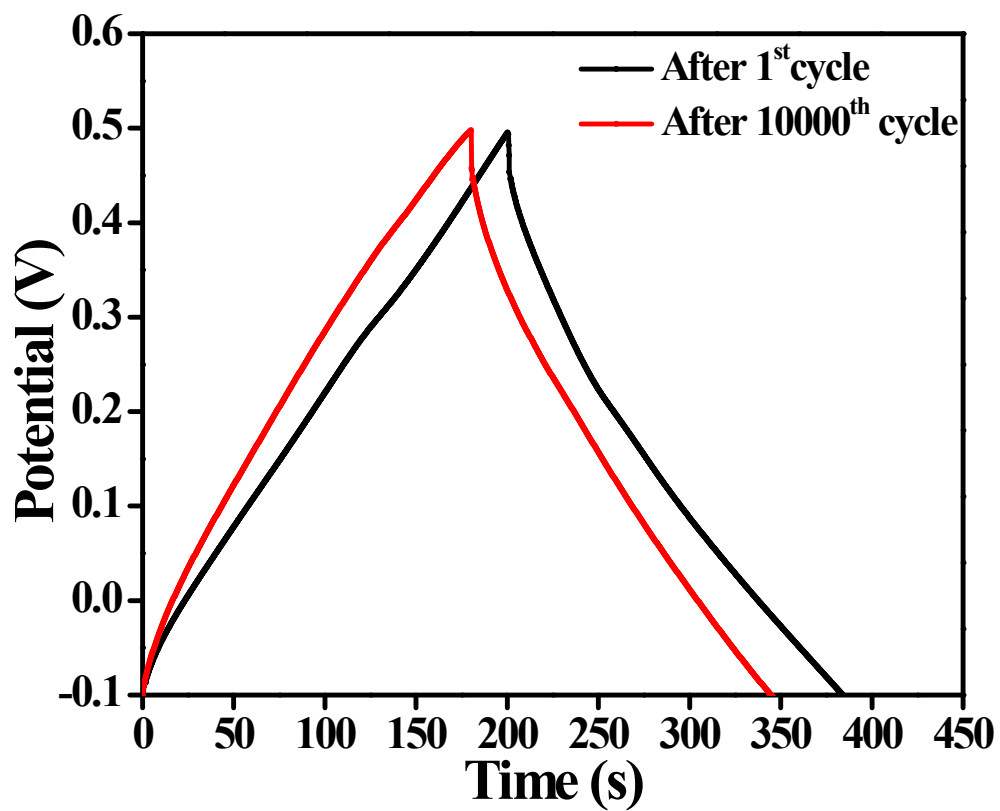

**Fig. S9** GCD curves of 3D CoO@MnO<sub>2</sub> core-shell nanohybrid at 5 A g<sup>-1</sup> (before and after stability).

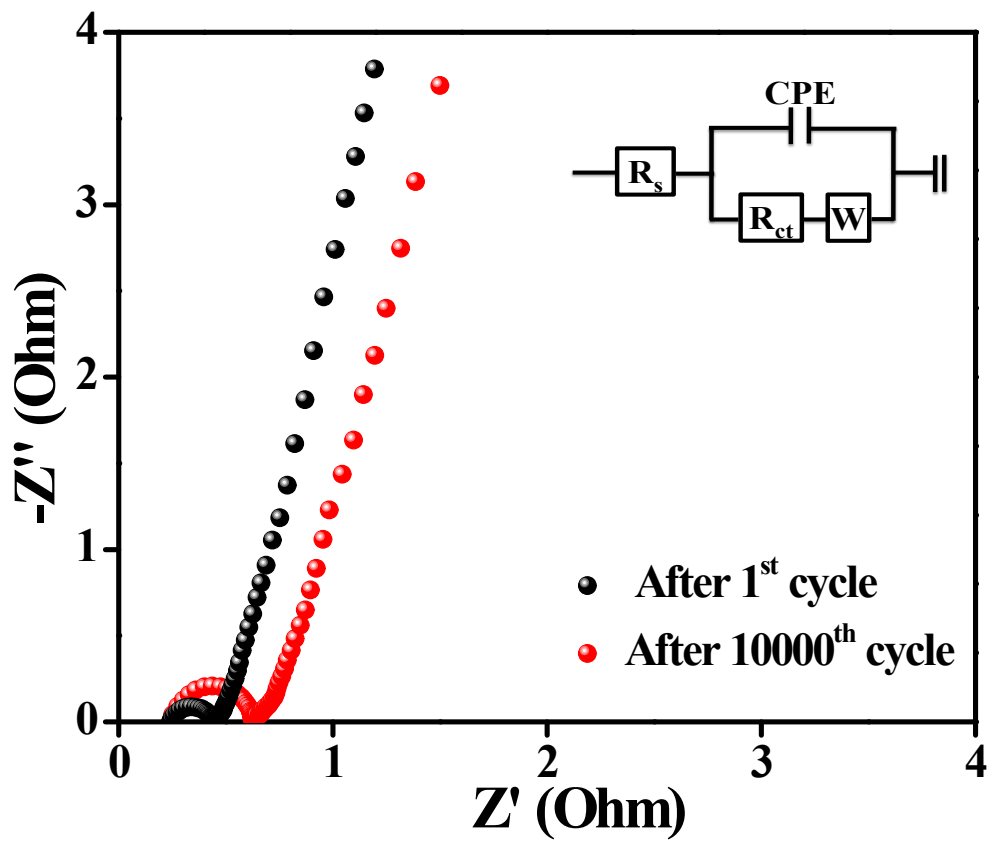

**Fig. S10** EIS spectrum of 3D CoO@MnO<sub>2</sub> core-shell nanohybrid before and after stability tests.

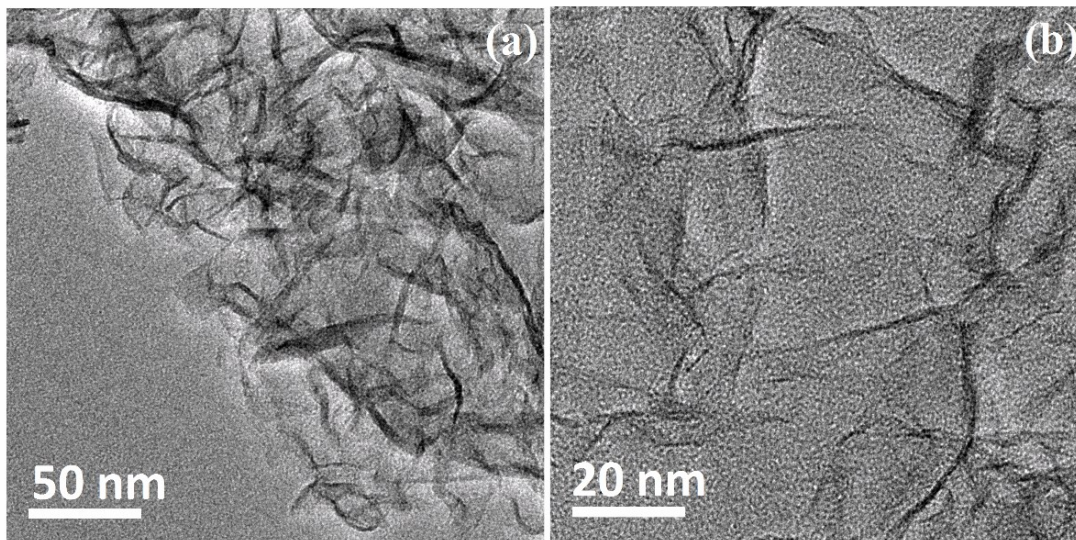

**Fig. S11** TEM images with different magnification of as-synthesized NG.

The NG shows that the continuous, transparent, and crumpled graphene sheets were stacked together and formed a few-layered structure, which was perhaps initiated by N-atoms doped into graphene matrices. Also, it can be seen from the images that the physical structure and nature of NG sheets are not strongly affected during the current synthesis method.

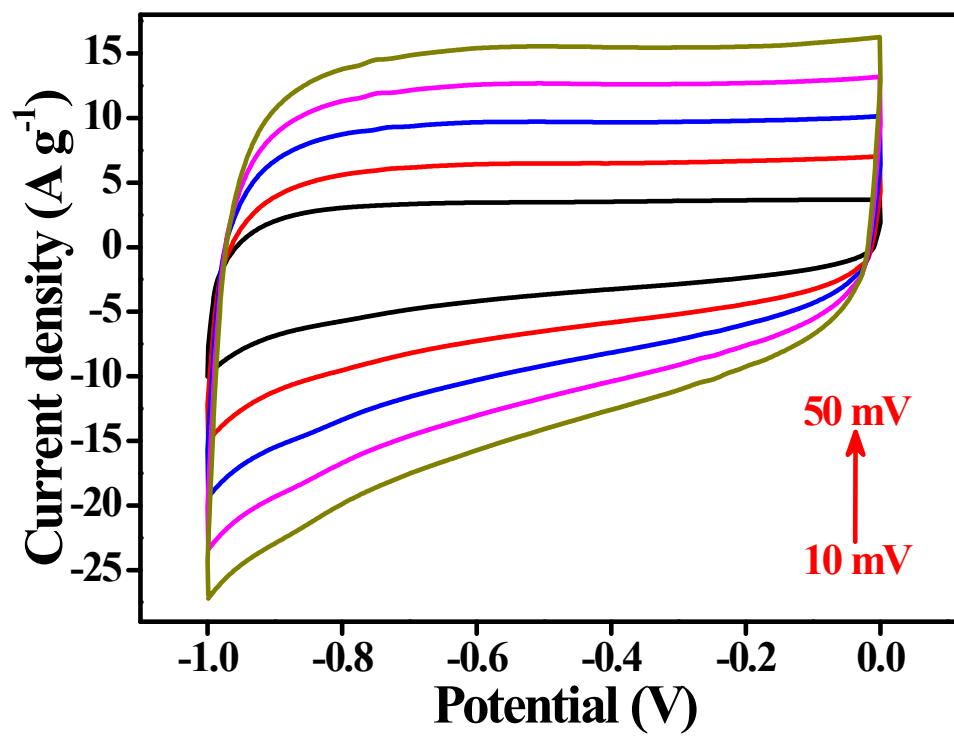

Fig. S12 CV curves of NG at different scan rates.

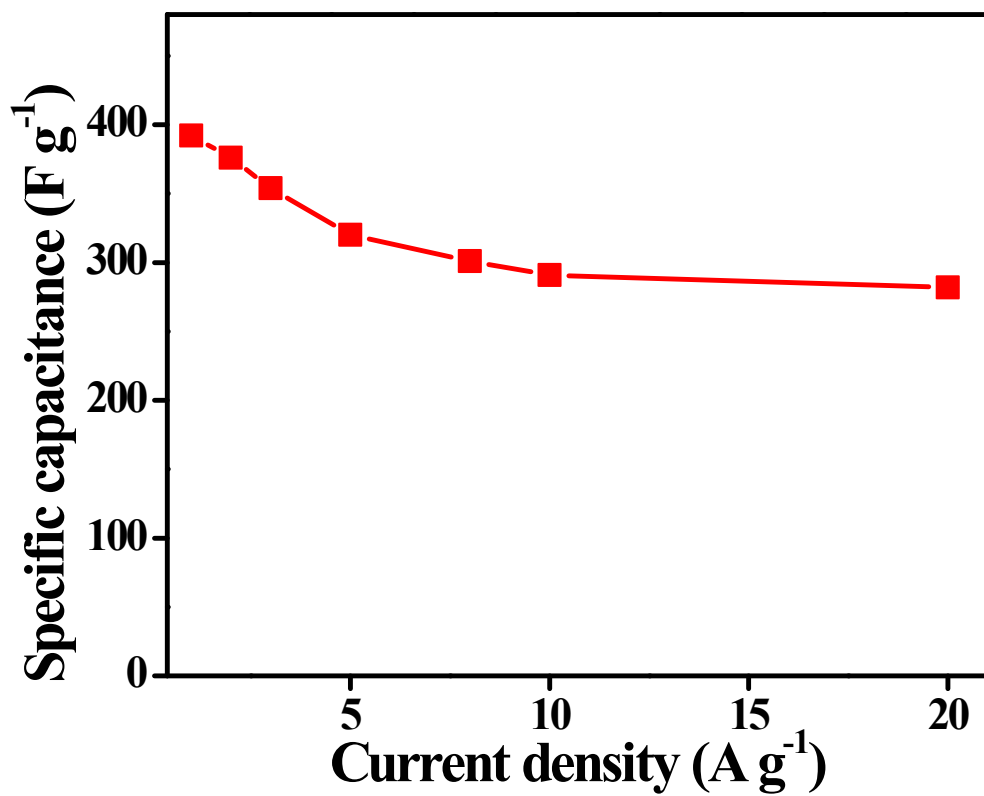

Fig. S13 Specific capacitance vs the current density of as-synthesized NG (three-electrode system).

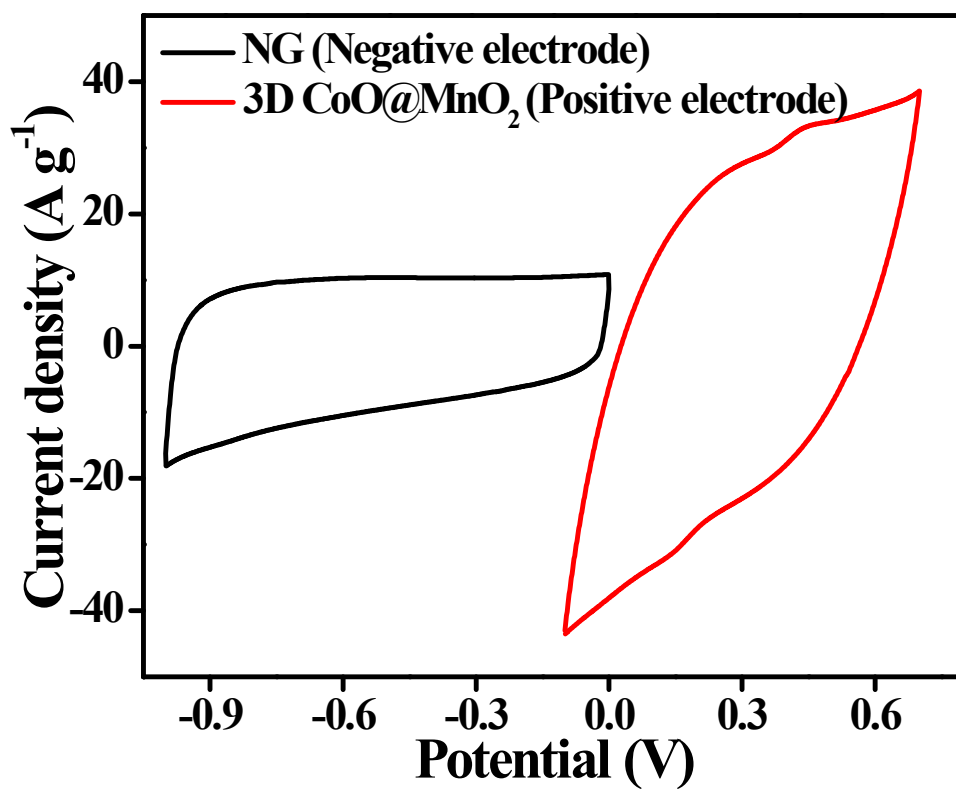

**Fig. S14** 3D CoO@MnO<sub>2</sub> core-shell nanohybrid and NG measured at the scan rate of 50 mVs<sup>-1</sup> in a three electrode system.

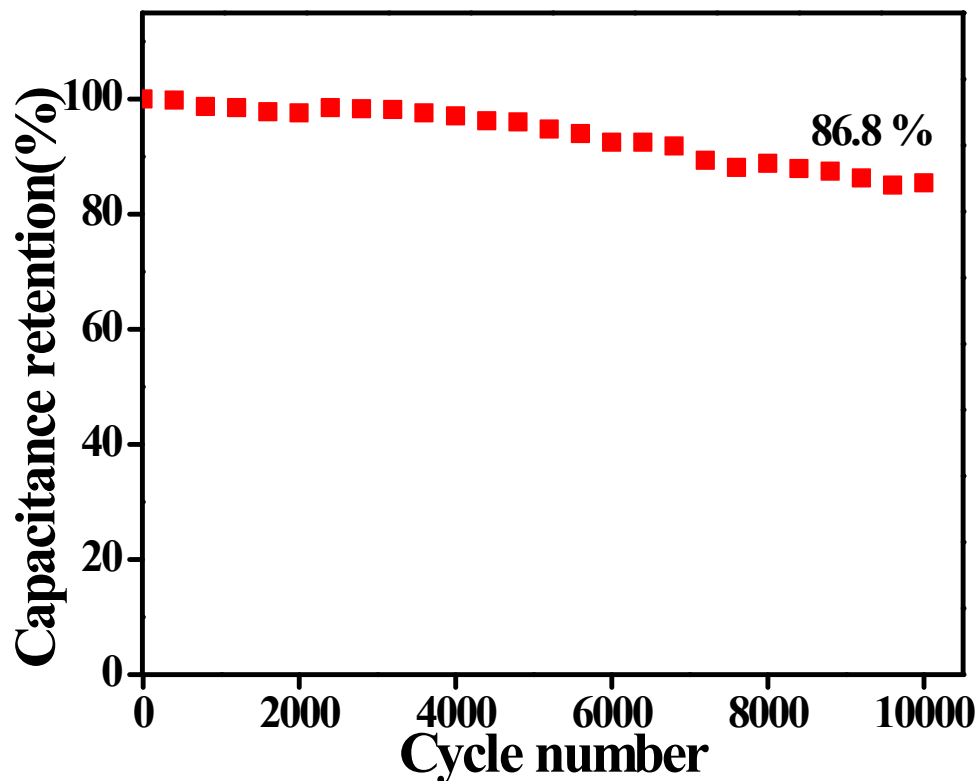

**Fig. S15** The cycling stability of 3D core-shell CoO@MnO<sub>2</sub> //NG ASC measured at a current density of 10 A g<sup>-1</sup> up to 10000 cycles test.



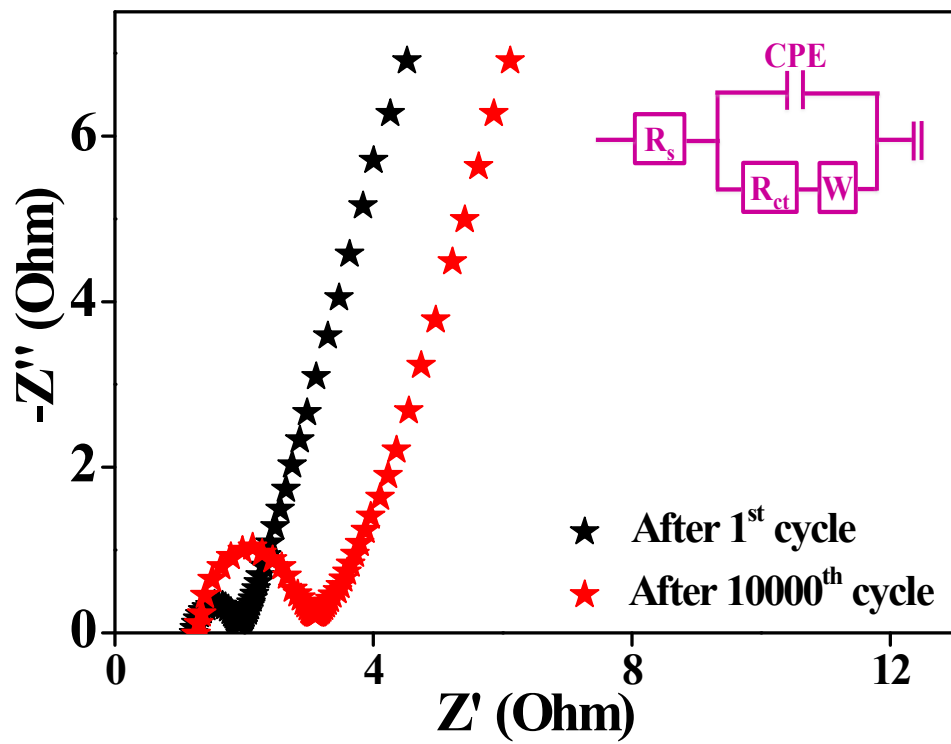

**Fig. S16** EIS comparison before and after stability test of 3D core-shell CoO@MnO<sub>2</sub>//NG ASC.

**Table S1.** Electrode properties comparison with reported literatures.

| Reported Electrode Materials                                          | Electrolyte                        | Voltage window (V) | Current density (A g <sup>-1</sup> ) | Mass Loading (mg cm <sup>-2</sup> )                                    | C <sub>sp</sub> (F g <sup>-1</sup> ) | Stability (Cycle No.) | Reference No. |
|-----------------------------------------------------------------------|------------------------------------|--------------------|--------------------------------------|------------------------------------------------------------------------|--------------------------------------|-----------------------|---------------|
| $\alpha$ -MnO <sub>2</sub> NWs@ $\delta$ -MnO <sub>2</sub> core-shell | 6 M KOH                            | -0.1-0.55          | 1                                    | m <sub>hybrid</sub> $\approx$ 1.5                                      | 231                                  | 98.1%<br>10000        | 1             |
| Co <sub>3</sub> O <sub>4</sub> @NiO NWs                               | 2 M KOH                            | 0-0.55             | 2                                    | m <sub>Co3O4</sub> $\approx$ 2.1<br>m <sub>NiO</sub> $\approx$ 0.9     | 853                                  | 95.1%<br>6000         | 2             |
| ZnO@Co <sub>3</sub> O <sub>4</sub>                                    | 2 M KOH                            | 0-0.52             | 1                                    | m <sub>Co3O4</sub> $\approx$ 1.5<br>m <sub>hybrid</sub> $\approx$ 2.0  | 858                                  | 128.7%<br>6000        | 3             |
| Ni@NiCo <sub>2</sub> O <sub>4</sub>                                   | 6 M KOH                            | 0-0.45             | 1                                    | m <sub>hybrid</sub> $\approx$ 1.54                                     | 899                                  | 93.2%<br>6000         | 4             |
| NiCo <sub>2</sub> O <sub>4</sub> @PAN I core-shell                    | 1 M H <sub>2</sub> SO <sub>4</sub> | 0-0.8              | 1                                    | m <sub>hybrid</sub> $\approx$ 0.89                                     | 901                                  | 91%<br>3000           | 5             |
| Co <sub>3</sub> O <sub>4</sub> @CeO <sub>2</sub>                      | 2 M KOH                            | 0-0.45             | 2.08                                 | m <sub>Co3O4</sub> $\approx$ 3.0<br>m <sub>hybrid</sub> $\approx$ 4.8  | 1038                                 | 94.4%<br>5000         | 6             |
| Co <sub>3</sub> O <sub>4</sub> @CoMoO <sub>4</sub>                    | 3 M KOH                            | 0-0.6              | 1                                    | —                                                                      | 1040                                 | 87.55%<br>5000        | 7             |
| Co <sub>3</sub> O <sub>4</sub> @Co(OH) <sub>2</sub> core-shell        | 2 M KOH                            | 0-0.4              | 1                                    | m <sub>Co3O4</sub> $\approx$ 1.2<br>m <sub>Co(OH)2</sub> $\approx$ 0.3 | 1095                                 | 92%<br>2000           | 8             |
| NiCo <sub>2</sub> O <sub>4</sub> @3D graphene                         | 6 M KOH                            | 0-0.5              | 1                                    | —                                                                      | 1402                                 | 76.6%<br>5000         | 9             |
| SnO <sub>2</sub> @Ni(OH) <sub>2</sub> core-shell                      | 6 M KOH                            | 0-0.5              | 0.5                                  | —                                                                      | 1553                                 | —                     | 10            |
| Co <sub>3</sub> O <sub>4</sub> @MnO <sub>2</sub>                      | 1 M LiOH                           | 0-0.5              | 1                                    | m <sub>Co3O4</sub> $\approx$                                           | 1693                                 | 89.8%                 | 11            |

|                                       |         |          |   |                                                                      |      |                |              |
|---------------------------------------|---------|----------|---|----------------------------------------------------------------------|------|----------------|--------------|
| Nanoedle<br>Arrays                    |         |          |   | 1.0                                                                  |      | 5000           |              |
|                                       |         |          |   | $m_{\text{MnO}_2} \approx$<br>0.67                                   |      |                |              |
| 3D core-shell<br>CoO@MnO <sub>2</sub> | 6 M KOH | -0.1-0.5 | 1 | $m_{\text{CoO}} \approx 1.24$<br>$m_{\text{hybrid}} \approx$<br>2.13 | 1835 | 97.7%<br>10000 | This<br>work |

**Table S2.** ASC Device properties comparison with reported literatures.

| Reported<br>ASC Device                                                          | Electrolyte                            | Device<br>Window<br>(V) | Energy<br>Density<br>( Wh kg <sup>-1</sup> ) | Power<br>Density<br>( kW kg <sup>-1</sup> ) | Stability<br>(Cycle<br>No.) | Reference<br>No. |
|---------------------------------------------------------------------------------|----------------------------------------|-------------------------|----------------------------------------------|---------------------------------------------|-----------------------------|------------------|
| GNR//GNR-MnO <sub>2</sub>                                                       | PAAK-KCl                               | 0-2                     | 29.4                                         | 12.1                                        | 88%<br>5000                 | 12               |
| H-TiO <sub>2</sub> @MnO <sub>2</sub> // H-<br>TiO <sub>2</sub> @C<br>core-shell | PVA-LiCl                               | 0-1.8                   | 59                                           | 0.045                                       | 91.2%<br>5000               | 13               |
| MnO <sub>2</sub> /Carbon fiber//<br>Graphene/Carbon<br>fiber                    | PVA-LiCl                               | 0-1.5                   | 27.2                                         | 0.98                                        | 95.2%<br>3000               | 14               |
| V <sub>2</sub> O <sub>5</sub> /Pin//rGO                                         | PVA-<br>LiNO <sub>3</sub>              | 0-1.8                   | 38.7                                         | 0.9                                         | 91.1%<br>5000               | 15               |
| RuO <sub>2</sub> -IL-CMG// IL-<br>CMG                                           | PVA-<br>H <sub>2</sub> SO <sub>4</sub> | 0-1.8                   | 19.7                                         | 0.5                                         | 79.4%<br>2000               | 16               |
| NiCo <sub>2</sub> O <sub>4</sub> /CC//PGP                                       | PVA-LiOH                               | 0-1.8                   | 60.9                                         | 0.57                                        | 96.8%<br>5000               | 17               |
| $\beta$ -Ni(OH) <sub>2</sub> //AC                                               | PVA-KOH                                | 0-1.4                   | 9.8                                          | 0.15                                        | 76%<br>2000                 | 18               |
| NiO// $\alpha$ -Fe <sub>2</sub> O <sub>3</sub>                                  | PVA-KOH                                | 0-1.25                  | 12.4                                         | 0.95                                        | 85%<br>10000                | 19               |

|                                                      |         |       |      |      |                |           |
|------------------------------------------------------|---------|-------|------|------|----------------|-----------|
| Carbon aerogel // Co <sub>3</sub> O <sub>4</sub> NWs | PVA-KOH | 0-1.5 | 17.9 | 0.75 | 85%<br>1000    | 20        |
| CoO@MnO <sub>2</sub> //NG                            | PVA-KOH | 0-1.8 | 85.9 | 0.85 | 86.8%<br>10000 | This work |

## Notes and References

- 1 Z. P. Ma, G. J. Shao, Y. Q. Fan, G. L. Wang, J. J. Song and D. J. Shen, *ACS Appl. Mater. Interfaces*, 2016, **8**, 9050-9058.
- 2 X. H. Xia, J. P. Tu, Y. Q. Zhang, X. L. Wang, C. D. Gu, X. B. Zhao and H. J. Fan, *ACS Nano*, 2012, **6**, 5531-5538.
- 3 D. P. Cai, H. Huang, D. D. Wang, B. Liu, L. L. Wang, Y. Liu, Q. H. Li and T. H. Wang, *ACS Appl. Mater. Interfaces*, 2014, **6**, 15905-15912.
- 4 G. X. Gao, H. B. Wu, S. J. Ding, L. M. Liu and X. W. Lou, *Small*, 2015, **11**, 804-808.
- 5 N. Jabeen, Q. Y. Xia, M. Yang and H. Xia, *ACS Appl. Mater. Interfaces*, 2016, **8**, 6093-6100.
- 6 J. W. Cui, X. Y. Zhang, L. Tong, J. B. Luo, Y. Wang, Y. Zhang, K. Xie and Y. C. Wu, *J. Mater. Chem. A*, 2015, **3**, 10425-10431.
- 7 Z. X. Gu, R. F. Wang, H. H. Nan, B. Y. Geng and X. J. Zhang, *J. Mater. Chem. A*, 2015, **3**, 14578-14584.
- 8 X. H. Xia, J. P. Tu, Y. Q. Zhang, J. Chen, X. L. Wang, C. D. Gu, C. Guan, J. S. Luo and H. J. Fan, *Chem. Mater.*, 2012, **24**, 3793-3799.
- 9 C. F. Zhang, T. Kuila, N. H. Kim, S. H. Lee and J. H. Lee, *Carbon*, 2015, **89**, 328-339.
- 10 Q. Q. Ke, C. Guan, M. R. Zheng, Y. T. Hu, K. H. Hoa and J. Wang, *J. Mater. Chem. A*,

- 2015, **3**, 9538-9542.
- 11 D. Z. Kong, J. S. Luo, Y. L. Wang, W. N. Ren, T. Yu, Y. S. Luo, Y. P. Yang and C. W. Cheng, *Adv. Funct. Mater.*, 2014, **24**, 3815-3826.
  - 12 M. K. Liu, W. W. Tjiu, J. S. Pan, C. Zhang, W. Gao and T. X. Liu, *Nanoscale*, 2014, **6**, 4233-4242.
  - 13 X. H. Lu, M. H. Yu, G. M. Wang, T. Zhai, S. L. Xie, Y. C. Ling, Y. X. Tong and Y. Li, *Adv. Mater.*, 2013, **25**, 267-272.
  - 14 N. Yu, H. Yin, W. Zhang, Y. Liu, Z. Y. Tang and M. Q. Zhu, *Adv. Energy Mater.*, 2016, **6**, 1501458.
  - 15 X. Zhou, Q. Chen, A. Q. Wang, J. Xu, S. S. Wu and J. Shen, *ACS Appl. Mater. Interfaces*, 2016, **8**, 3776-3783.
  - 16 B. G. Choi, S. J. Chang, H. W. Kang, C. P. Park, H. J. Kim, W. H. Hong, S. G. Lee and Y. S. Huh, *Nanoscale*, 2012, **4**, 4983-4988.
  - 17 Z. Gao, W. L. Yang, J. Wang, N. N. Song and X. D. Li, *Nano Energy*, 2015, **13**, 306-317.
  - 18 S. T. Senthilkumar and R. K. Selvan, *Phys. Chem. Chem. Phys.*, 2014, **16**, 15692-15698.
  - 19 S. W. Zhang, B. Yin, Z. B. Wang and F. Peter, *Chemical Engineering Journal*, 2016, **306**, 193-203.
  - 20 W. W. Liu, X. Li, M. H. Zhu and X. He, *J. Power Sources*, 2015, **282**, 179-186.
